# Supplementary material for: Community engagement approaches for malaria prevention, control and elimination: a scoping review protocol
Source: PubMed Central journal article supplement — BMJ Open. 2021 Oct 5;11(10):e049812. doi: 10.1136/bmjopen-2021-049812 (PMC8493896; doi:10.1136/bmjopen-2021-049812), 2021-10-05
Supplement: bmjopen-2021-049812.draft_revisions.pdf [file bmjopen-2021-049812.draft_revisions.pdf]

# BMJ Open

BMJ Open is committed to open peer review. As part of this commitment we make the peer review history of every article we publish publicly available.

When an article is published we post the peer reviewers' comments and the authors' responses online. We also post the versions of the paper that were used during peer review. These are the versions that the peer review comments apply to.

The versions of the paper that follow are the versions that were submitted during the peer review process. They are not the versions of record or the final published versions. They should not be cited or distributed as the published version of this manuscript.

BMJ Open is an open access journal and the full, final, typeset and author-corrected version of record of the manuscript is available on our site with no access controls, subscription charges or pay-per-view fees (<http://bmjopen.bmj.com>).

If you have any questions on BMJ Open's open peer review process please email [info.bmjopen@bmj.com](mailto:info.bmjopen@bmj.com)

# BMJ Open

## Community Engagement Interventions for Malaria Prevention, Control and Elimination: A Scoping Review Protocol

|                               |                                                                                                                                                                                                                                                                                                 |
|-------------------------------|-------------------------------------------------------------------------------------------------------------------------------------------------------------------------------------------------------------------------------------------------------------------------------------------------|
| Journal:                      | <i>BMJ Open</i>                                                                                                                                                                                                                                                                                 |
| Manuscript ID                 | bmjopen-2021-049812                                                                                                                                                                                                                                                                             |
| Article Type:                 | Protocol                                                                                                                                                                                                                                                                                        |
| Date Submitted by the Author: | 02-Feb-2021                                                                                                                                                                                                                                                                                     |
| Complete List of Authors:     | Awasthi, Kiran Raj; Curtin University<br>Leavy, Justine ; Curtin University, School of Public Health<br>Jancey, Jonine; Curtin University, Western Australian Centre for Health Promotion Research, School of Public Health<br>Clements, Archie ; Curtin University, Faculty of Health Sciences |
| Keywords:                     | Public health < INFECTIOUS DISEASES, Tropical medicine < INFECTIOUS DISEASES, PUBLIC HEALTH, Quality in health care < HEALTH SERVICES ADMINISTRATION & MANAGEMENT                                                                                                                               |
|                               |                                                                                                                                                                                                                                                                                                 |

SCHOLARONE™  
Manuscripts

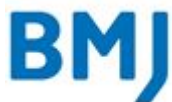

I, the Submitting Author has the right to grant and does grant on behalf of all authors of the Work (as defined in the below author licence), an exclusive licence and/or a non-exclusive licence for contributions from authors who are: i) UK Crown employees; ii) where BMJ has agreed a CC-BY licence shall apply, and/or iii) in accordance with the terms applicable for US Federal Government officers or employees acting as part of their official duties; on a worldwide, perpetual, irrevocable, royalty-free basis to BMJ Publishing Group Ltd ("BMJ") its licensees and where the relevant Journal is co-owned by BMJ to the co-owners of the Journal, to publish the Work in this journal and any other BMJ products and to exploit all rights, as set out in our [licence](#).

The Submitting Author accepts and understands that any supply made under these terms is made by BMJ to the Submitting Author unless you are acting as an employee on behalf of your employer or a postgraduate student of an affiliated institution which is paying any applicable article publishing charge ("APC") for Open Access articles. Where the Submitting Author wishes to make the Work available on an Open Access basis (and intends to pay the relevant APC), the terms of reuse of such Open Access shall be governed by a Creative Commons licence – details of these licences and which [Creative Commons](#) licence will apply to this Work are set out in our licence referred to above.

Other than as permitted in any relevant BMJ Author's Self Archiving Policies, I confirm this Work has not been accepted for publication elsewhere, is not being considered for publication elsewhere and does not duplicate material already published. I confirm all authors consent to publication of this Work and authorise the granting of this licence.

1  
2  
3  
4  
5  
6  
7  
8  
9  
10  
11  
12  
13  
14  
15  
16  
17  
18  
19  
20  
21  
22  
23  
24  
25  
26  
27  
28  
29  
30  
31  
32  
33  
34  
35  
36  
37  
38  
39  
40  
41  
42  
43  
44  
45  
46  
47  
48  
49  
50  
51  
52  
53  
54  
55  
56  
57  
58  
59  
60

## Title: Community Engagement Interventions for Malaria Prevention, Control and Elimination: A Scoping Review Protocol

Kiran Raj Awasthi <sup>1,\*</sup>, Jonine Jancey <sup>1</sup>, Archie Clements <sup>1</sup>, Justine E. Leavy <sup>1</sup>

<sup>1</sup> School of Public Health, Curtin University, GPO Box U1987, Perth, WA 6845, Australia

\*Correspondence: [kiran.awasthi@curtin.edu.au](mailto:kiran.awasthi@curtin.edu.au); Tel.: +61-424906590

**Abstract:** Community engagement strategies need to be adopted by countries for malaria prevention, control, and ultimately elimination. As the decline of malaria has plateaued over the last five years, strengthening community engagement approaches will be necessary to enhance health promotion practice and policy to drive malaria transmission down further. Countries have adopted community engagement interventions (CEI) on malaria that best suit their context, however, there is a paucity of evidence on CEIs, the potential implementation barriers and facilitators and their outcomes.

**Objectives** The objectives of the review are to map the available evidence on the types of CEI for 1) malaria prevention; 2) malaria control; and 3) malaria elimination; and 4) describe the barriers, facilitators and the outcomes of the CEIs.

**Design** The scoping review methodology will be based on the Arksey and O'Malles's framework.

**Data Source** Proquest, PubMed, Web of Knowledge, Google Scholar, and Medline will be searched for publications from January 2000 to current.

**Eligibility Criteria** Will include primary studies written in the English language using appropriate study designs and methods, including quantitative, qualitative and mixed methods designs; and case, program or project reports. Information on CEIs designed specifically for malaria prevention, control and/or elimination.

**Expected results** This scoping review aims to identify the available evidence, sources of information and research gaps in the area of CE as one approach for malaria prevention, control and/or elimination.

**Key words:** community engagement; community participation; community mobilization; social mobilization; community action; malaria; prevention; control; elimination; countries

This is an Open Access article distributed in accordance with the Creative Commons Attribution Non Commercial (CC BY-NC 4.0) license, which permits others to distribute, remix, adapt, build upon this work non-commercially, and license their derivative works on different terms, provided the original work is properly cited and the use is non-commercial.

### Strengths and limitations of the study

- To the best of our knowledge, this is the first scoping review to be undertaken on CEI for malaria prevention, control and elimination.
- The scoping review process will be informed by the University Health Science reference librarian.
- The review will be conducted on peer reviewed published primary sources in English.
- As this will be a scoping review, the study will be limited to providing existing evidence on the topic with an aim to identify and conduct a narrative synthesis only of the various CEIs.

## INTRODUCTION

Malaria, a vector borne disease, remains a major public health challenge contributing to an estimated 228 million cases and 400,000 deaths annually worldwide.<sup>1</sup> Globally, between 2010 and 2014, there was a 70 % decrease in malaria incidence, however, in the last five years the progress towards further reduction has been relatively static.<sup>2</sup> The earlier decrease in cases was attributed to scaling up of routine interventions such as free distribution of long-lasting insecticidal nets (LLINs) or insecticide treated nets (ITNs), periodic indoor residual spraying (IRS), prompt treatment of diagnosed cases, and use of Artemisinin based Combination Therapy (ACT) for the treatment of *Plasmodium falciparum* malaria.<sup>1,3-5</sup>

Community engagement (CE) is defined as “a process of working collaboratively with groups of people who are affiliated by geographic proximity, special interests, or similar situations, with respect to issues affecting their wellbeing” (p9).<sup>6</sup> CE has been adopted especially by Lower Middle Income Countries (LMICs) in a quest to reach elimination of malaria by 2030, consistent with the World Health Organization Global Malaria Strategy 2016–2030.<sup>7,8</sup> CE has been deployed as a prevention and treatment strategy in a variety of countries in a range of national programs, such as: mass drug administration for malaria prevention in Myanmar and Laos;<sup>9,10</sup> increasing the use of LLINs and promoting early testing and treatment in Cambodia;<sup>11</sup> and improving testing facilities in communities in Zambia.<sup>12</sup> A variety of strategies have been implemented as part of CE interventions (CEI), which has included: formation of a community leadership group comprising locals (leaders, elderly and youth); drama campaigns and health education programs delivered in settings such as schools and churches; house-to-house visits by community health volunteers to improve early detection and timely treatment in areas with high levels of migration; and conducting participatory action research led by the community.<sup>9-12</sup>

Health interventionists use the CE approach to engage and harness communities in health promotion practice, research and policy decision making to address a variety of health and health-related issues to support behavioural and environmental change.<sup>13</sup> CE can be effective in dealing with health inequalities especially among disadvantaged groups who are challenged by structural, cultural, financial and language barriers.<sup>14</sup> Countries have adopted different community engagement interventions (CEI) that best suit their context and community, however, there is paucity of evidence on the results of these CEIs including the potential barriers and facilitators and outcome. An understanding of the components of CEI used for malaria prevention, control and elimination may assist program planners, managers and policy makers in adapting or selecting suitable activities relevant to their community.

This paper describes the protocol for a scoping review that aims to describe CEIs targeting the prevention, control or elimination of malaria that have been/ or are being implemented by countries and to identify the barriers, facilitators to implementing the interventions and their outcomes.

## REVIEW OBJECTIVES

The objectives of the review are to map the available evidence on the types of CEI for 1) malaria prevention; 2) malaria control; and 3) malaria elimination; and 4) describe the barriers, facilitators and the outcomes of the CEIs.

## METHODS

## Protocols and Registration

During a preliminary search, a 2016 systematic review was found that focused on one element of malaria prevention ([https://doi: 10.1186/s12936-016-1593-y](https://doi.org/10.1186/s12936-016-1593-y): Malaria Journal).<sup>15</sup> However, no scoping review on community engagement has been conducted to date incorporating all components of malaria prevention, control and elimination across countries.

## Eligibility Criteria

The review will only consider interventions studies published from 2000 onwards, a period encompassing two important landmarks, the advent of the Millennium Development Goals (2000-2014) and the Sustainable Development Goals (2015-2030).<sup>16</sup>

The evidence will be included if the sources are:

- Primary studies;
- Written in the English language;
- Using appropriate study designs and methods, including quantitative, qualitative and mixed methods designs; and case, program or project reports;
- Providing information on CEIs designed specifically for malaria prevention, control and/or elimination.

The evidence will be excluded if the sources are:

- Secondary studies including systematic reviews;
- Published in languages other than English;
- Providing information on CEIs for diseases or health issues other than malaria;
- Providing anecdotal evidence without a description of the study design and methods.

## Information Sources and Search

The search strategy involves searching the databases for peer-reviewed published literature focusing on CEI conducted for malaria prevention, control or elimination. The search followed the updated methodology outlined by the Joanna Briggs Institute guide for scoping reviews in 2017,<sup>17,18</sup> which itself is based on the framework developed by Arksey and O'Malley<sup>19</sup> and further developed by Levac Colquhoun and O'Brien.<sup>20</sup> A scoping review is a valid process of synthesizing evidence on a given topic providing an excerpt of the volume of the literature or studies without seeking to analyse it.<sup>21</sup> Primarily an exploratory approach, scoping reviews can shed light on the types of evidence available, the way studies have been conducted and help identify and map the evidence that is available in the area of interest.<sup>21,22</sup>

Five databases including Proquest, PubMed, Web of Knowledge, Google Scholar, and Medline (OVID) will be searched using key words: "community engagement" OR "community participation" OR "community involvement" OR "public engagement" OR "community mobilization" OR "social mobilization" OR "community action" AND "prevention", "control", "elimination" AND "malaria" AND "low income countries" OR "middle income countries" OR "high income countries" OR "developing countries" OR "developed countries". The key words have been defined based on the objectives of the

1  
2  
3 study. Initially the search will be limited to the article title and abstract for studies published  
4 between January 2000 and the current date. The search will be further streamlined by  
5 searching for citations from the reference lists of papers selected from the initial search. For  
6 papers not available online, the first author (K.R.A.) will contact the lead author of the  
7 publication via email requesting a copy of the paper for review.  
8  
9

### 10 **Selection of sources of evidence**

11 The title and the abstract obtained from the search results will be examined by two  
12 reviewers after the initial search. In the first stage of the study selection, the title and  
13 abstract from search results obtained by K.R.A will be examined by two reviewers (J.J., J.E.L.)  
14 independent of one another. The selection of the final studies will be agreed upon by three  
15 reviewers (K.R.A.; J.J.; J.E.L.). During the final selection process, any differences regarding  
16 inclusion and exclusion of papers among the three reviewers will be discussed, and a fourth  
17 reviewer (A.C.) will be called upon to reach consensus.  
18  
19  
20

### 21 **Data Charting process**

22 The data charting process will map the findings according to the attributes: author;  
23 date/year of publication; country/ site; aim/ objectives; study population; sample size; study  
24 design; barriers; facilitators; outcomes. The charting will be done by K.R.A and will be  
25 reviewed by two reviewers (J.J. and J.E.L.). Any disputes or differences will be resolved by  
26 the fourth reviewer (A.C.).  
27  
28  
29

### 30 **Presentation of the Results**

31 The PRISMA extension for scoping reviews (PRISMA\_ScR) will be used to present the review  
32 methods and the results from the search.<sup>23</sup> The 22 items checklist for reporting systematic  
33 reviews comprising of two optional items (critical appraisal of sources and summary of the  
34 evidences) will be followed while presenting the results of the scoping review. The items  
35 include eligibility criteria, the search approach, methods of selecting the evidence and the  
36 data charting process. The search process and the evidence flow across various stages of the  
37 study will be presented visually using an additional diagram. Furthermore, the selected  
38 evidence based on the source, study characteristics and the major findings (including the  
39 barriers, facilitators and outcomes) will be mapped and presented in tabular form. The  
40 results will be synthesized in congruence with the scoping review objectives and a narrative  
41 description will be presented. The main findings will be synthesized to highlight the  
42 limitations and provide an analysis of CEIs paving way for future research opportunities.  
43  
44  
45  
46

### 47 **Expected Results**

48 This scoping review aims to identify the available evidence, sources of information and  
49 research gaps in the area of CE as one approach for malaria prevention, control and/or  
50 elimination. The study will also increase the understanding of the existing barriers and  
51 facilitators in implementing interventions using a CE approach along with the outcomes. The  
52 results from this review will inform future practice and research in this area. This scoping  
53 review is a component of formative research underpinning a proposed CEI in Nepal. It is  
54 anticipated that the findings will inform and support recommendations made to local  
55 authorities (i.e.at the rural municipality level) during the design and implementation phase  
56 of a CEI focussed on malaria prevention and control in Nepal.  
57  
58  
59  
60

## FUNDING

This research has not received any external funding.

## ACKNOWLEDGEMENTS

The authors would like to acknowledge the input of Vanessa Varis, Health Sciences reference librarian for her support in the designing the initial search strategy.

## CONFLICT OF INTEREST

The authors declare no conflict of interest.

## ETHICS AND DISSEMINATION

This study only aims to review the secondary sources and does not require human research ethics committee approval. Nonetheless being a component of a mixed methods study, human ethics approval has been obtained from Nepal Health Research Council (ERB 632/2020, Ref. No. 1287) and Curtin University's Human Research Ethics Committee number HRE2020-0701. The results of the scoping review will be disseminated to a community advisory board in a rural municipality in Nepal to help inform their CEI design proposed for 2021. Furthermore, the findings of the scoping review will be submitted to a peer reviewed journal for wider dissemination.

## AUTHOR CONTRIBUTIONS

KRA conceptualized the topic and wrote the original draft. JL, AC and JJ supervised the writing process and were involved in review and editing of the manuscript.

## ORCID ID

Kiran Raj Awasthi <https://orcid.org/0000-0001-6448-7696>

(Word count: 1588)

## REFERENCES

1. World Health Organization. World malaria report 2019. WHO Geneva 2019.
2. Panda S, Swaminathan S, Hyder KA, et al. Drug resistance in malaria, tuberculosis, and HIV in South East Asia: biology, programme, and policy considerations. *BMJ*. 2017;358:j3545.
3. World Health Organization. World malaria report 2018. WHO Geneva 2018.
4. World Health Organization. WHA68 2: Global technical strategy and targets for malaria 2016–2030. World Health Organization 2015.
5. Bhatt S, Weiss D, Cameron E, et al. The effect of malaria control on *Plasmodium falciparum* in Africa between 2000 and 2015. *Nature*. 2015;526(7572):207-11.
6. Control for Disease Control and Prevention. Principles of community engagement. CDC/ATSDR Committee on Community Engagement Atlanta, GA. 1997.
7. Epidemiology and Disease Control Division. Nepal Malaria Strategic Plan 2014-2025. Department of Health Services 2016.
8. World Health Organization. Global technical strategy and targets for malaria 2016–2030. WHO Geneva 2015.



- 1
  - 2
  - 3
  - 4
  - 5
  - 6
  - 7
  - 8
  - 9
  - 10
  - 11
  - 12
  - 13
  - 14
  - 15
  - 16
  - 17
  - 18
  - 19
  - 20
  - 21
  - 22
  - 23
  - 24
  - 25
  - 26
  - 27
  - 28
  - 29
  - 30
  - 31
  - 32
  - 33
  - 34
  - 35
  - 36
  - 37
  - 38
  - 39
  - 40
  - 41
  - 42
  - 43
  - 44
  - 45
  - 46
  - 47
  - 48
  - 49
  - 50
  - 51
  - 52
  - 53
  - 54
  - 55
  - 56
  - 57
  - 58
  - 59
  - 60
9. Adhikari B, Pell C, Phommason K, et al. Elements of effective community engagement: lessons from a targeted malaria elimination study in Lao PDR (Laos). *Global health action*. 2017;10(1):1366136.
10. Kajechiwa L, Thwin MM, Nosten S, et al. Community engagement for the rapid elimination of malaria: the case of Kayin State, Myanmar. *Wellcome Open Res*. 2017;2:59.
11. Lim R, Tripura R, Peto TJ, et al. Drama as a community engagement strategy for malaria in rural Cambodia. *Wellcome Open Res*. 2017;2:95.
12. Gordon A, Vander Meulen RJ, et al. The 2019 Isdell: Flowers Cross Border Malaria Initiative Round Table: community engagement in the context of malaria elimination. *Malar J*. 2019;18:432.
13. Wallerstein N, Minkler M, Carter-Edwards L, et al. Improving health through community engagement, community organization, and community building. *Health behavior: theory, research and practice*. 2015;5.
14. Cyril S, Smith BJ, Possamai-Inesedy A, et al. Exploring the role of community engagement in improving the health of disadvantaged populations: a systematic review. *Global health action*. 2015;8(1):29842.
15. Adhikari B, James N, Newby G, et al. Community engagement and population coverage in mass anti-malarial administrations: a systematic literature review. *Malar J*. 2016;15(1):523.
16. Sachs JD. From millennium development goals to sustainable development goals. *The Lancet*. 2012;379(9832):2206-11.
17. Peters M, Godfrey C, Mclnerney P, et al. Methodology for JBI scoping reviews. The Joanna Briggs Institute Reviewers manual 2015: The Joanna Briggs Institute; 2015. p. 3-24.
18. Peters MD, Godfrey CM, Khalil H, et al. Guidance for conducting systematic scoping reviews. *International journal of evidence-based healthcare*. 2015;13(3):141-146.
19. Arksey H, O'Malley L. Scoping studies: towards a methodological framework. *International Journal of Social Research Methodology*. 2005;8(1):19-32.
20. Levac D, Colquhoun H, O'Brien KK. Scoping studies: advancing the methodology. *Implementation Science*. 2010;5:69.
21. Munn Z, Peters MDJ, Stern C, et al. Systematic review or scoping review? Guidance for authors when choosing between a systematic or scoping review approach. *BMC Med Res Methodol*. 2018;18(1):1-7.
22. Pham MT, Rajić A, Greig JD, et al. A scoping review of scoping reviews: advancing the approach and enhancing the consistency. *Res Synth Methods*. 2014;5(4):371-85.
23. Tricco AC, Lillie E, Zarin W, et al. PRISMA extension for scoping reviews (PRISMA-ScR): checklist and explanation. *Annals of internal medicine*. 2018;169(7):467-73.

## Preferred Reporting Items for Systematic reviews and Meta-Analyses extension for Scoping Reviews (PRISMA-ScR) Checklist

| SECTION                                               | ITEM | PRISMA-ScR CHECKLIST ITEM                                                                                                                                                                                                                                                                                  | REPORTED ON PAGE # |
|-------------------------------------------------------|------|------------------------------------------------------------------------------------------------------------------------------------------------------------------------------------------------------------------------------------------------------------------------------------------------------------|--------------------|
| <b>TITLE</b>                                          |      |                                                                                                                                                                                                                                                                                                            |                    |
| Title                                                 | 1    | Identify the report as a scoping review.                                                                                                                                                                                                                                                                   | 1                  |
| <b>ABSTRACT</b>                                       |      |                                                                                                                                                                                                                                                                                                            |                    |
| Structured summary                                    | 2    | Provide a structured summary that includes (as applicable): background, objectives, eligibility criteria, sources of evidence, charting methods, results, and conclusions that relate to the review questions and objectives.                                                                              | 1                  |
| <b>INTRODUCTION</b>                                   |      |                                                                                                                                                                                                                                                                                                            |                    |
| Rationale                                             | 3    | Describe the rationale for the review in the context of what is already known. Explain why the review questions/objectives lend themselves to a scoping review approach.                                                                                                                                   | 2                  |
| Objectives                                            | 4    | Provide an explicit statement of the questions and objectives being addressed with reference to their key elements (e.g., population or participants, concepts, and context) or other relevant key elements used to conceptualize the review questions and/or objectives.                                  | 2                  |
| <b>METHODS</b>                                        |      |                                                                                                                                                                                                                                                                                                            |                    |
| Protocol and registration                             | 5    | Indicate whether a review protocol exists; state if and where it can be accessed (e.g., a Web address); and if available, provide registration information, including the registration number.                                                                                                             | 3                  |
| Eligibility criteria                                  | 6    | Specify characteristics of the sources of evidence used as eligibility criteria (e.g., years considered, language, and publication status), and provide a rationale.                                                                                                                                       | 3                  |
| Information sources*                                  | 7    | Describe all information sources in the search (e.g., databases with dates of coverage and contact with authors to identify additional sources), as well as the date the most recent search was executed.                                                                                                  | 3                  |
| Search                                                | 8    | Present the full electronic search strategy for at least 1 database, including any limits used, such that it could be repeated.                                                                                                                                                                            | 3-4                |
| Selection of sources of evidence†                     | 9    | State the process for selecting sources of evidence (i.e., screening and eligibility) included in the scoping review.                                                                                                                                                                                      | 4                  |
| Data charting process‡                                | 10   | Describe the methods of charting data from the included sources of evidence (e.g., calibrated forms or forms that have been tested by the team before their use, and whether data charting was done independently or in duplicate) and any processes for obtaining and confirming data from investigators. | 4                  |
| Data items                                            | 11   | List and define all variables for which data were sought and any assumptions and simplifications made.                                                                                                                                                                                                     | 4                  |
| Critical appraisal of individual sources of evidence§ | 12   | If done, provide a rationale for conducting a critical appraisal of included sources of evidence; describe the methods used and how this information was used in any data synthesis (if appropriate).                                                                                                      | 4                  |
| Synthesis of results                                  | 13   | Describe the methods of handling and summarizing the data that were charted.                                                                                                                                                                                                                               | 4                  |

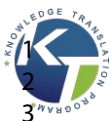

St. Michael's

Inspired Care.  
Inspiring Science.

1

| SECTION                                       | ITEM | PRISMA-ScR CHECKLIST ITEM                                                                                                                                                                       | REPORTED ON PAGE # |
|-----------------------------------------------|------|-------------------------------------------------------------------------------------------------------------------------------------------------------------------------------------------------|--------------------|
| <b>RESULTS</b>                                |      |                                                                                                                                                                                                 |                    |
| Selection of sources of evidence              | 14   | Give numbers of sources of evidence screened, assessed for eligibility, and included in the review, with reasons for exclusions at each stage, ideally using a flow diagram.                    |                    |
| Characteristics of sources of evidence        | 15   | For each source of evidence, present characteristics for which data were charted and provide the citations.                                                                                     |                    |
| Critical appraisal within sources of evidence | 16   | If done, present data on critical appraisal of included sources of evidence (see item 12).                                                                                                      |                    |
| Results of individual sources of evidence     | 17   | For each included source of evidence, present the relevant data that were charted that relate to the review questions and objectives.                                                           |                    |
| Synthesis of results                          | 18   | Summarize and/or present the charting results as they relate to the review questions and objectives.                                                                                            |                    |
| <b>DISCUSSION</b>                             |      |                                                                                                                                                                                                 |                    |
| Summary of evidence                           | 19   | Summarize the main results (including an overview of concepts, themes, and types of evidence available), link to the review questions and objectives, and consider the relevance to key groups. |                    |
| Limitations                                   | 20   | Discuss the limitations of the scoping review process.                                                                                                                                          |                    |
| Conclusions                                   | 21   | Provide a general interpretation of the results with respect to the review questions and objectives, as well as potential implications and/or next steps.                                       |                    |
| <b>FUNDING</b>                                |      |                                                                                                                                                                                                 |                    |
| Funding                                       | 22   | Describe sources of funding for the included sources of evidence, as well as sources of funding for the scoping review. Describe the role of the funders of the scoping review.                 |                    |

JB1 = Joanna Briggs Institute; PRISMA-ScR = Preferred Reporting Items for Systematic reviews and Meta-Analyses extension for Scoping Reviews.

\* Where *sources of evidence* (see second footnote) are compiled from, such as bibliographic databases, social media platforms, and Web sites.

† A more inclusive/heterogeneous term used to account for the different types of evidence or data sources (e.g., quantitative and/or qualitative research, expert opinion, and policy documents) that may be eligible in a scoping review as opposed to only studies. This is not to be confused with *information sources* (see first footnote).

‡ The frameworks by Arksey and O'Malley (6) and Levac and colleagues (7) and the JBI guidance (4, 5) refer to the process of data extraction in a scoping review as data charting.

§ The process of systematically examining research evidence to assess its validity, results, and relevance before using it to inform a decision. This term is used for items 12 and 19 instead of "risk of bias" (which is more applicable to systematic reviews of interventions) to include and acknowledge the various sources of evidence that may be used in a scoping review (e.g., quantitative and/or qualitative research, expert opinion, and policy document).

From: Tricco AC, Lillie E, Zarin W, O'Brien KK, Colquhoun H, Levac D, et al. PRISMA Extension for Scoping Reviews (PRISMA-ScR): Checklist and Explanation. *Ann Intern Med.* 2018;169:467–473. doi: [10.7326/M18-0850](https://doi.org/10.7326/M18-0850).

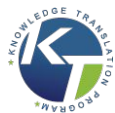

**St. Michael's**

Inspired Care.  
Inspiring Science.

For peer review only

1  
2  
3  
4  
5  
6  
7  
8  
9  
10  
11  
12  
13  
14  
15  
16  
17  
18  
19  
20  
21  
22  
23  
24  
25  
26  
27  
28  
29  
30  
31  
32  
33  
34  
35  
36  
37  
38  
39  
40  
41  
42  
43  
44  
45  
46  
47  
48  
49  
50  
51  
52  
53  
54  
55  
56  
57  
58  
59  
60

# BMJ Open

## Community Engagement Approaches for Malaria Prevention, Control and Elimination: A Scoping Review Protocol

|                                 |                                                                                                                                                                                                                                                                                                                                                                    |
|---------------------------------|--------------------------------------------------------------------------------------------------------------------------------------------------------------------------------------------------------------------------------------------------------------------------------------------------------------------------------------------------------------------|
| Journal:                        | <i>BMJ Open</i>                                                                                                                                                                                                                                                                                                                                                    |
| Manuscript ID                   | bmjopen-2021-049812.R1                                                                                                                                                                                                                                                                                                                                             |
| Article Type:                   | Protocol                                                                                                                                                                                                                                                                                                                                                           |
| Date Submitted by the Author:   | 09-Aug-2021                                                                                                                                                                                                                                                                                                                                                        |
| Complete List of Authors:       | Awasthi, Kiran Raj; Curtin University Faculty of Health Sciences, Curtin School of Population Health<br>Jancey, Jonine; Curtin University Faculty of Health Sciences, Western Australian Centre for Health Promotion Research<br>Clements, Archie ; Curtin University, Faculty of Health Sciences<br>Leavy, Justine ; Curtin University Faculty of Health Sciences |
| <b>Primary Subject Heading</b>: | Infectious diseases                                                                                                                                                                                                                                                                                                                                                |
| Secondary Subject Heading:      | Epidemiology, Global health, Infectious diseases, Public health                                                                                                                                                                                                                                                                                                    |
| Keywords:                       | Public health < INFECTIOUS DISEASES, Tropical medicine < INFECTIOUS DISEASES, PUBLIC HEALTH, Quality in health care < HEALTH SERVICES ADMINISTRATION & MANAGEMENT, Epidemiology < INFECTIOUS DISEASES, Epidemiology < TROPICAL MEDICINE                                                                                                                            |
|                                 |                                                                                                                                                                                                                                                                                                                                                                    |

SCHOLARONE™  
Manuscripts

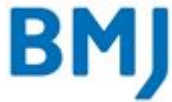

I, the Submitting Author has the right to grant and does grant on behalf of all authors of the Work (as defined in the below author licence), an exclusive licence and/or a non-exclusive licence for contributions from authors who are: i) UK Crown employees; ii) where BMJ has agreed a CC-BY licence shall apply, and/or iii) in accordance with the terms applicable for US Federal Government officers or employees acting as part of their official duties; on a worldwide, perpetual, irrevocable, royalty-free basis to BMJ Publishing Group Ltd ("BMJ") its licensees and where the relevant Journal is co-owned by BMJ to the co-owners of the Journal, to publish the Work in this journal and any other BMJ products and to exploit all rights, as set out in our [licence](#).

The Submitting Author accepts and understands that any supply made under these terms is made by BMJ to the Submitting Author unless you are acting as an employee on behalf of your employer or a postgraduate student of an affiliated institution which is paying any applicable article publishing charge ("APC") for Open Access articles. Where the Submitting Author wishes to make the Work available on an Open Access basis (and intends to pay the relevant APC), the terms of reuse of such Open Access shall be governed by a Creative Commons licence – details of these licences and which [Creative Commons](#) licence will apply to this Work are set out in our licence referred to above.

Other than as permitted in any relevant BMJ Author's Self Archiving Policies, I confirm this Work has not been accepted for publication elsewhere, is not being considered for publication elsewhere and does not duplicate material already published. I confirm all authors consent to publication of this Work and authorise the granting of this licence.

1  
2  
3  
4 1 **Title: Community Engagement Approaches for Malaria Prevention, Control and Elimination:**  
5 2 **A Scoping Review Protocol**  
6

7  
8 3 Kiran Raj Awasthi <sup>1,\*</sup>, Jonine Jancey <sup>1</sup>, Archie Clements <sup>1</sup>, Justine E. Leavy <sup>1</sup>  
9

10 4 <sup>1</sup> Faculty of Health Sciences, Curtin University, GPO Box U1987, Perth, WA 6845, Australia  
11

12 5 \*Correspondence: [kiran.awasthi@curtin.edu.au](mailto:kiran.awasthi@curtin.edu.au); Tel.: +61-424906590  
13

14 6 **ORCID ID:** Kiran Raj Awasthi <https://orcid.org/0000-0001-6448-7696>  
15  
16 7

17  
18 8 **Key words:** community engagement; community participation; malaria; prevention; control;  
19 9 elimination  
20  
21

22  
23 10 (Word count: 2,112)  
24  
25  
26  
27  
28  
29  
30  
31  
32  
33  
34  
35  
36  
37  
38  
39  
40  
41  
42  
43  
44  
45  
46  
47  
48  
49  
50  
51  
52  
53  
54  
55  
56  
57  
58  
59  
60

1  
2  
3  
4 1  
5  
6 2  
7  
8 3  
9  
10  
11 4  
12  
13 5  
14  
15 6  
16  
17 7  
18  
19  
20 8  
21  
22 9  
23  
24 10  
25  
26 11  
27  
28  
29 12  
30  
31 13  
32  
33 14  
34  
35 15  
36  
37 16  
38  
39 17  
40  
41 18  
42  
43 19  
44  
45 20  
46  
47 21  
48  
49 22  
50  
51 23  
52  
53 24  
54  
55 25  
56  
57 26  
58  
59 27  
60 28  
29

**Title: Community Engagement Approaches for Malaria Prevention, Control and Elimination:  
A Scoping Review Protocol**

Kiran Raj Awasthi <sup>1,\*</sup>, Jonine Jancey <sup>1</sup>, Archie Clements <sup>1</sup>, Justine E. Leavy <sup>1</sup>

<sup>1</sup> School of Public Health, Curtin University, GPO Box U1987, Perth, WA 6845, Australia

\*Correspondence: [kiran.awasthi@curtin.edu.au](mailto:kiran.awasthi@curtin.edu.au); Tel.: +61-424906590

**Abstract:**

**Introduction:** Community engagement (CE) is important for malaria prevention, control, and ultimately elimination. As the decline of malaria has plateaued over the last five years, strengthening community engagement approaches will be necessary to enhance health promotion practice and policy to drive malaria transmission down further. Countries have adopted a wide range of public health intervention approaches on malaria prevention and control that best suit their context. This review will examine the existing evidence on the various CE approaches adopted by malaria programs and their outcomes.

**Methodology and Analysis:** The review methodology will follow the updated Joanna Briggs Institute guide for scoping review, 2017, which is based on the framework developed by Arksey and O'Malley and further developed by Levac Colquhoun and O'Brien. Proquest, Web of Knowledge, and Medline will be searched for publications from January 2000 to 31<sup>st</sup> March 2021 while Google search engine will be used to find any grey literature. The eligibility criteria includes: primary studies written in the English language using appropriate study designs and methods, including quantitative, qualitative and mixed methods designs; and case, program or project reports. CE approaches designed specifically for malaria prevention, control, elimination and their outcomes will be explored. Subheadings and free



1 text terms for “community engagement” and “malaria” will be used for the search. The article  
2 screening and data extraction will be examined by two reviewers after the initial search and  
3 any disputes will be resolved by a third reviewer through discussion. The PRISMA extension  
4 for scoping reviews (PRISMA\_ScR) guide will be used to present the review methods and  
5 the results.

6 **Ethics and Dissemination:** This study does not require human research ethics committee  
7 approval. The findings of the scoping review will be submitted to a peer reviewed journal for  
8 wider dissemination.

9  
10 This is an Open Access article distributed in accordance with the Creative Commons  
11 Attribution Non Commercial (CC BY-NC 4.0) license, which permits others to distribute,  
12 remix, adapt, build upon this work non-commercially, and license their derivative works on

### 13 **Strengths and limitations of the study**

- 14 • To our knowledge, this is the first scoping review to be undertaken on CE approaches  
15 for malaria prevention, control and elimination.
- 16 • The University Health Science reference librarian will assist in developing a search  
17 strategy for the scoping review, is a strength.
- 18 • The review will include peer reviewed published primary sources in English, therefore  
19 publications in languages other than English and unpublished articles will be excluded,  
20 a limitation of this study.

## 21 **INTRODUCTION**

### 22 **INTRODUCTION**

23 Malaria, a vector borne disease, remains a major public health challenge contributing to an  
24 estimated 228 million cases and 400,000 deaths annually worldwide.<sup>1</sup> Globally, between 2010  
25 and 2014, there was a 70 % decrease in malaria incidence, however, in the last five years the  
26 progress towards further reduction has been relatively static.<sup>2</sup> The earlier decrease in cases was  
27 attributed to scaling up of routine interventions such as free distribution of long-lasting  
28 insecticidal nets (LLINs) or insecticide treated nets (ITNs), periodic indoor residual spraying  
29 (IRS), prompt treatment of diagnosed cases, and use of Artemisinin based Combination Therapy  
30 (ACT) for the treatment of *Plasmodium falciparum* malaria.<sup>1,3-5</sup> Whilst some countries focus their  
strategies on malaria prevention by enabling and promoting use of LLINs/ IRS/ larvicides and

1  
2  
3  
4 1 chemoprophylaxis alongside malaria control programs that target a reduction of the disease  
5 2 burden to a level where it is no longer a public health concern; countries with fewer malaria  
6 3 cases aim for elimination that is to ensure sustained zero local transmission of malaria in the  
7 4 population within a set geographic boundary through a strengthened surveillance system.<sup>1</sup>  
8  
9

10  
11 5 Community engagement (CE) is defined as “a process of working collaboratively with groups  
12 6 of people who are affiliated by geographic proximity, special interests, or similar situations,  
13 7 with respect to issues affecting their wellbeing” (p9).<sup>6</sup> CE has been adopted especially by  
14 8 Lower Middle Income Countries (LMICs) in a quest to reach elimination of malaria by 2030,  
15 9 consistent with the World Health Organization Global Malaria Strategy 2016–2030.<sup>7,8</sup> CE has  
16 10 been used to co-design public health interventions and approaches for prevention and control  
17 11 of malaria in a variety of countries in a range of national programs, such as: mass drug  
18 12 administration for malaria prevention in Myanmar and Laos;<sup>9,10</sup> increasing the use of LLINs  
19 13 and promoting early testing and treatment in Cambodia and Kenya;<sup>11</sup> and improving access  
20 14 to diagnosis and treatment in communities in Zambia.<sup>12</sup> A variety of activities have been  
21 15 implemented for malaria prevention, control, and elimination based on CE: formation of a  
22 16 community leadership group comprising locals (leaders, elderly and youth); drama campaigns  
23 17 and health education programs delivered in settings such as schools and churches; house-to-  
24 18 house visits by community health volunteers to improve early detection and timely treatment  
25 19 in areas with high levels of migration; and conducting participatory action research led by the  
26 20 community.<sup>9-12</sup>  
27  
28  
29  
30  
31  
32  
33  
34  
35

36  
37 21 Health interventionists’ use CE to harness communities in health promotion practice, research  
38 22 and policy related decision making to advance knowledge and support behavioural and  
39 23 environmental change to improve health outcomes.<sup>13</sup> Public health interventions can  
40 24 incorporate CE in different forms: providing information; consultation; joint decision-making;  
41 25 acting collaboratively; and supporting the community interests independently.<sup>14</sup> CE can be  
42 26 effective in dealing with health inequalities especially among disadvantaged groups who are  
43 27 challenged by structural, geographical, cultural, financial and language barriers.<sup>15</sup>  
44 28 Internationally a range of community engagement has been used to best suit the context and  
45 29 the target community. For example in Malawi the community based health animators have  
46 30 been used by the national malaria program to improve awareness and promote positive  
47 31 behavioural change in the community<sup>16</sup>, whilst in Nigeria integrated community case  
48 32 management has been used to detect and treat malaria cases in remote areas using trained  
49 33 community health workers thereby also minimizing the travel time and the cost for the patients  
50 34<sup>17</sup>. Similarly, in Cameroon and Cambodia local volunteers and village malaria workers have  
51 35 been used to conduct proactive and reactive case detection in communities for preventing  
52  
53  
54  
55  
56  
57  
58  
59  
60

1 transmission<sup>11,18</sup>, whilst the Interactive Malaria Awareness Program (MAP) in South Africa  
2 have successfully used home-based care workers to form local level partnerships and also  
3 educate communities on malaria prevention and control<sup>19</sup>. All these different CE approaches  
4 have contributed to improved awareness, early detection of cases and improved access and  
5 wider community acceptance for malaria prevention and treatment in the afore mentioned  
6 countries.<sup>16-19</sup>

7 This paper describes the protocol for a scoping review that aims to describe CE approaches  
8 targeting the prevention, control or elimination of malaria that have been/ or are being  
9 implemented by countries and to identify the outcomes of these approaches which includes  
10 barriers and facilitators.

## 11 **REVIEW OBJECTIVES**

12 The objectives of the review are to map the available evidence on the types of CE  
13 approaches for 1) malaria prevention; 2) malaria control; and 3) malaria elimination; and 4)  
14 describe the outcomes of the CE approaches.

## 16 **METHODS**

### 17 **Protocols and Registration**

18 During a preliminary search, a 2016 systematic review was found that focused on one  
19 element of malaria prevention ([https://doi: 10.1186/s12936-016-1593-y](https://doi:10.1186/s12936-016-1593-y): Malaria Journal).<sup>20</sup>  
20 However, no scoping review on community engagement has been conducted to date  
21 incorporating different approaches to all components of malaria prevention, control and  
22 elimination across countries.

### 23 **Eligibility Criteria**

24 The review will only consider interventions studies published from 2000 onwards till the end  
25 of March 2021, a period encompassing two important landmarks, the advent of the Millennium  
26 Development Goals (2000-2014) and the Sustainable Development Goals (2015-2030).<sup>21</sup>

27 The evidence will be included if the sources are:

- 28 • Primary studies;
- 29 • Written in the English language;
- 30 • Using appropriate study designs and methods, including quantitative, qualitative and  
31 mixed methods designs; and case, program or project reports;

- Providing information on CE approaches designed specifically for malaria prevention, control and/or elimination.

The evidence will be excluded if the sources are:

- Secondary studies including systematic reviews;
- Published in languages other than English;
- Providing information on CE approaches for diseases or health issues other than malaria;
- Providing anecdotal evidence without a description of the study design and methods.

## Information Sources and Search

The search strategy involves searching the databases for peer-reviewed published literature focusing on CE activities conducted for malaria prevention, control or elimination. The search methodology will follow the updated Joanna Briggs Institute guide for scoping reviews in 2017,<sup>22, 23</sup> which is based on the framework developed by Arksey and O'Malley<sup>24</sup> and further developed by Levac Colquhoun and O'Brien.<sup>25</sup> A scoping review is a valid process of synthesizing evidence on a given topic providing an excerpt of the volume of the literature or studies without seeking to analyse it.<sup>26</sup> Primarily an exploratory approach, scoping reviews can shed light on the types of evidence available, the way studies have been conducted and help identify and map the evidence that is available in the area of interest.<sup>26,27</sup>

Databases including Proquest, Web of Science, and Medline (OVID) will be searched using key words: "community engagement" OR "community participation" OR "community involvement" OR "public engagement" OR "community mobilization" OR "social mobilization" OR "community action" OR "community empowerment" OR "community led" OR "community conversation" AND "prevention", "control", "elimination" AND "malaria" . Similarly, advanced Google search will be used to find grey literature including case, program or project reports using the same key words. The key words have been defined based on the objectives of the study. Initially the search will be limited to the article title and abstract for studies published between January 2000 and the current date. The search will be further streamlined by searching for citations from the reference lists of papers selected from the initial search. For papers not available online, the first author (K.R.A.) will contact the lead author of the publication via email requesting a copy of the paper for review.

## Selection of Sources of Evidence

1  
2  
3  
4 1 The title and the abstract obtained from the search results will be examined by two reviewers  
5 2 after the initial search. In the first stage of the study selection, the title and abstract from  
6 3 search results obtained by K.R.A will be examined by two reviewers (J.J., J.E.L.)  
7 4 independent of one another. The selection of the final studies will be agreed upon by three  
8 5 reviewers (K.R.A.; J.J.; J.E.L.). During the final selection process, any differences regarding  
9 6 inclusion and exclusion of papers among the three reviewers will be discussed, and a fourth  
10 7 reviewer (A.C.) will be called upon to reach consensus.  
11  
12  
13  
14  
15

### 16 9 **Data Charting Process**

17  
18 10 The data charting process will map the findings according to the attributes: author; date/year  
19 11 of publication; country/ site; aim/ objectives; study population; sample size; study design;  
20 12 phases; barriers; facilitators; outcomes. The charting will be done by K.R.A and will be  
21 13 reviewed by two reviewers (J.J. and J.E.L.). Any disputes or differences will be resolved by  
22 14 the fourth reviewer (A.C.).  
23  
24  
25  
26  
27

### 28 16 **Presentation of the Results**

29 17 The PRISMA extension for scoping reviews (PRISMA\_ScR) will be used to present the  
30 18 review methods and the results from the search.<sup>28</sup> The 22 items checklist for reporting  
31 19 systematic reviews comprising of two optional items (critical appraisal of sources and  
32 20 summary of the evidences) will be followed while presenting the results of the scoping  
33 21 review. The items include eligibility criteria, the search approach, methods of selecting the  
34 22 evidence and the data charting process. The search process and the evidence flow across  
35 23 various stages of the study will be presented visually using an additional diagram.  
36 24 Furthermore, the selected evidence based on the source, study characteristics and the  
37 25 major findings (including the barriers, facilitators and outcomes) will be mapped and  
38 26 presented in tabular form. The results will be synthesized in congruence with the scoping  
39 27 review objectives and a narrative description will be presented. The main findings will be  
40 28 synthesized to highlight the limitations and provide an analysis of CE approaches paving  
41 29 way for future research opportunities.  
42  
43  
44  
45  
46  
47  
48  
49  
50

### 51 31 **Expected Results**

52  
53 32 This scoping review aims to identify the available evidence, sources of information and  
54 33 research gaps in the area of CE as one approach for malaria prevention, control and/or  
55 34 elimination. The study will also increase the understanding of the existing barriers and  
56 35 facilitators in implementing interventions using a CE approach along with the outcomes. The  
57 36 results from this review will inform future practice and research in this area.  
58  
59  
60

## ETHICS AND DISSEMINATION

This study only aims to review the secondary sources and does not require human research ethics committee approval. Nonetheless being a component of a mixed methods study, human ethics approval has been obtained from Nepal Health Research Council (ERB 632/2020, Ref. No. 1287) and Curtin University's Human Research Ethics Committee number HRE2020-0701. The findings of the scoping review will be submitted to a peer reviewed journal for wider dissemination.

## REFERENCES

1. World Health Organization. World malaria report 2019. Who Geneva 2019.
2. Panda S, Swaminathan S, Hyder KA, et al. Drug resistance in malaria, tuberculosis, and HIV in South East Asia: biology, programme, and policy considerations. *BMJ*. 2017;358:j3545.
3. World Health Organization. World malaria report 2018. WHO Geneva 2018.
4. World Health Organization. WHA68 2: Global technical strategy and targets for malaria 2016–2030. World Health Organization 2015.
5. Bhatt S, Weiss D, Cameron E, et al. The effect of malaria control on *Plasmodium falciparum* in Africa between 2000 and 2015. *Nature*. 2015;526(7572):207-11.
6. Control for Disease Control and Prevention. Principles of community engagement. CDC/ATSDR Committee on Community Engagement Atlanta, GA. 1997.
7. Epidemiology and Disease Control Division. Nepal Malaria Strategic Plan 2014-2025. Department of Health Services 2016.
8. World Health Organization. Global technical strategy and targets for malaria 2016–2030. WHO Geneva 2015.
9. Adhikari B, Pell C, Phommasone K, et al. Elements of effective community engagement: lessons from a targeted malaria elimination study in Lao PDR (Laos). *Global health action*. 2017;10(1):1366136.
10. Kajeewiwa L, Thwin MM, Nosten S, et al. Community engagement for the rapid elimination of malaria: the case of Kayin State, Myanmar. *Wellcome Open Res*. 2017;2:59.
11. Lim R, Tripura R, Peto TJ, et al. Drama as a community engagement strategy for malaria in rural Cambodia. *Wellcome Open Res*. 2017;2:95.

- 1  
2  
3  
4 1 12. Gordon A, Vander Meulen RJ, et al. The 2019 Isdell: Flowers Cross Border Malaria  
5 2 Initiative Round Table: community engagement in the context of malaria elimination. *Malar J.*  
6 3 2019;18:432.  
7  
8 4 13. Wallerstein N, Minkler M, Carter-Edwards L, et al. Improving health through  
9 5 community engagement, community organization, and community building. *Health behavior:*  
10 6 *theory, research and practice.* 2015;5.  
11  
12 7 14. O'Mara-Eves, A., G. Brunton, S. Oliver, J. Kavanagh, F. Jamal and J. Thomas  
13 8 (2015). "The effectiveness of community engagement in public health interventions for  
14 9 disadvantaged groups: a meta-analysis." *BMC public health* **15**(1): 1-23.  
15  
16 10 15. Cyril S, Smith BJ, Possamai-Inesedy A, et al. Exploring the role of community  
17 11 engagement in improving the health of disadvantaged populations: a systematic review.  
18 12 *Global health action.* 2015;8(1):29842.  
19  
20 13 16. Kaunda-Khangamwa, B. N., H. Van Den Berg, R. S. McCann, A. Kabaghe, W.  
21 14 Takken, K. Phiri, M. Van Vugt and L. Manda-Taylor (2019). "The role of health animators in  
22 15 malaria control: a qualitative study of the health animator (HA) approach within the Majete  
23 16 malaria project (MMP) in Chikwawa District, Malawi." *BMC Health services research* **19**(1):  
24 17 1-16.  
25  
26 18 17. Alegbeleye, A., J. Dada, O. Oresanya, J. Jiya, H. Counihan, P. Gimba, L. Ozor and  
27 19 K. Maxwell (2019). "Community engagement and mobilisation of local resources to support  
28 20 integrated Community Case Management of childhood illnesses in Niger State, Nigeria."  
29 21 *Journal of global health* **9**(1).  
30  
31 22 18. Bekolo, C. E. and T. D. A. Williams (2019). "Adding proactive and reactive case  
32 23 detection into the integrated community case management system to optimise diagnosis and  
33 24 treatment of malaria in a high transmission setting of Cameroon: an observational quality  
34 25 improvement study." *BMJ open* **9**(6): e026678.  
35  
36 26 19. Cox, S. N., K. E. Guidera, M. J. Simon, B. A. S. Nonyane, W. Brieger, M. S.  
37 27 Bornman and P. S. Kruger (2018). "Interactive malaria education intervention and its effect  
38 28 on community participant knowledge: the malaria awareness program in Vhembe district,  
39 29 Limpopo, South Africa." *International quarterly of community health education* **38**(2): 147-  
40 30 158.  
41  
42 31 20. Adhikari B, James N, Newby G, et al. Community engagement and population  
43 32 coverage in mass anti-malarial administrations: a systematic literature review. *Malar J.*  
44 33 2016;15(1):523.  
45  
46  
47  
48  
49  
50  
51  
52  
53  
54  
55  
56  
57  
58  
59  
60

- 1  
2  
3  
4 1 21. Sachs JD. From millennium development goals to sustainable development goals.  
5 2 *The Lancet*. 2012;379(9832):2206-11.  
6  
7 3 22. Peters M, Godfrey C, McInerney P, et al. Methodology for JBI scoping reviews. The  
8 4 Joanna Briggs Institute Reviewers manual 2017: The Joanna Briggs Institute; 2017. p. 3-24.  
9  
10 5 23. Peters MD, Godfrey CM, Khalil H, et al. Guidance for conducting systematic scoping  
11 6 reviews. *International journal of evidence-based healthcare*. 2015;13(3):141-146.  
12  
13 7 24. Arksey H, O'Malley L. Scoping studies: towards a methodological framework.  
14 8 *International Journal of Social Research Methodology*. 2005;8(1):19-32.  
15  
16 9 25. Levac D, Colquhoun H, O'Brien KK. Scoping studies: advancing the methodology.  
17 10 *Implementation Science*. 2010;5:69.  
18  
19 11 26. Munn Z, Peters MDJ, Stern C, et al. Systematic review or scoping review? Guidance  
20 12 for authors when choosing between a systematic or scoping review approach. *BMC Med*  
21 13 *Res Methodol*. 2018;18(1):1-7.  
22  
23 14 27. Pham MT, Rajić A, Greig JD, et al. A scoping review of scoping reviews: advancing  
24 15 the approach and enhancing the consistency. *Res Synth Methods*. 2014;5(4):371-85.  
25  
26 16 28. Tricco AC, Lillie E, Zarin W, et al. PRISMA extension for scoping reviews (PRISMA-  
27 17 ScR): checklist and explanation. *Annals of internal medicine*. 2018;169(7):467-73.  
28  
29  
30  
31  
32

### 19 ACKNOWLEDGEMENTS

20 The authors would like to acknowledge the input of Vanessa Varis, Health Sciences  
21 reference librarian for her support in the designing the initial search strategy.  
22

### 23 AUTHOR CONTRIBUTIONS

24 KRA conceptualized the topic and wrote the original draft. JL, AC and JJ supervised the  
25 writing process and were involved in review and editing of the manuscript.  
26

### 27 FUNDING

28 This research received no specific grant from any funding agency in the public, commercial  
29 or not for profit sectors.  
30

### 31 CONFLICT OF INTEREST

32 The authors declare no conflict of interest.  
33

### 34 ORCID ID

35 Kiran Raj Awasthi <https://orcid.org/0000-0001-6448-7696>  
36



1  
2  
3  
4  
5  
6  
7  
8  
9  
10  
11  
12  
13  
14  
15  
16  
17  
18  
19  
20  
21  
22  
23  
24  
25  
26  
27  
28  
29  
30  
31  
32  
33  
34  
35  
36  
37  
38  
39  
40  
41  
42  
43  
44  
45  
46  
47  
48  
49  
50  
51  
52  
53  
54  
55  
56  
57  
58  
59  
60

1 (Word count: 2,112)

2

3

4

For peer review only

## Proposed Search Strategy

### MEDLINE

- 1 Community Participation/ or Community-Based Participatory Research/ or Community-institutional relations/ or Community networks/
- 2 (communit\* adj3 (engage\* or conversation\* or action\* or consult\* or dialog\*)).mp. [mp=title, abstract, original title, name of substance word, subject heading word, floating sub-heading word, keyword heading word, organism supplementary concept word, protocol supplementary concept word, rare disease supplementary concept word, unique identifier, synonyms]
- 3 (communit\* adj3 (particip\* or involve\* or empower\* or collab\* or le?d\*)).mp. [mp=title, abstract, original title, name of substance word, subject heading word, floating sub-heading word, keyword heading word, organism supplementary concept word, protocol supplementary concept word, rare disease supplementary concept word, unique identifier, synonyms]
- 4 ((communit\* or soci\* or public\*) adj mobili\*).mp. [mp=title, abstract, original title, name of substance word, subject heading word, floating sub-heading word, keyword heading word, organism supplementary concept word, protocol supplementary concept word, rare disease supplementary concept word, unique identifier, synonyms]
- 5 1 or 2 or 3 or 4
- 6 exp Malaria/
- 7 (malaria adj3 (prevent\* or control\* or eliminat\* or erad\*)).mp. [mp=title, abstract, original title, name of substance word, subject heading word, floating sub-heading word, keyword heading word, organism supplementary concept word, protocol supplementary concept word, rare disease supplementary concept word, unique identifier, synonyms]
- 8 6 or 7
- 9 5 and 8
- 10 limit 9 to (english language and yr="2000 -Current")

### WEB OF SCIENCE (topic search)

- 1 (communit\* NEAR/3 (engage\* or conversation\* or action\* or consult\* or dialog\*))
- 2 (communit\* NEAR/3 (particip\* or involve\* or empower\* or collab\* or led\* or lead\*))
- 3 ((communit\* or soci\* or public\*) NEAR mobili\*)
- 4 1 or 2 or 3
- 5 (malaria NEAR/3 (prevent\* or control\* or eliminat\* or erad\*))
- 6 4 and 5
- 7 limit 6 to English language and timespan=2000 -2021

**PROQUEST (anywhere except full text NOFT)**

- 1 (communit\* NEAR/3 (engage\* or conversation\* or action\* or consult\* or dialog\*))
- 2 (communit\* NEAR/3 (particip\* or involve\* or empower\* or collab\* or le?d\*))
- 3 ((communit\* or soci\* or public\*) NEAR mobili\*)
- 4 1 or 2 or 3
- 5 (malaria NEAR/3 (prevent\* or control\* or eliminat\* or erad\*))
- 6 4 and 5
- 7 limit 6 to English language and Date=2000 -Current
- 8 limit 7 to Scholarly Journals OR Peer Reviewed

## Preferred Reporting Items for Systematic reviews and Meta-Analyses extension for Scoping Reviews (PRISMA-ScR) Checklist

| SECTION                                               | ITEM | PRISMA-ScR CHECKLIST ITEM                                                                                                                                                                                                                                                                                  | REPORTED ON PAGE # |
|-------------------------------------------------------|------|------------------------------------------------------------------------------------------------------------------------------------------------------------------------------------------------------------------------------------------------------------------------------------------------------------|--------------------|
| <b>TITLE</b>                                          |      |                                                                                                                                                                                                                                                                                                            |                    |
| Title                                                 | 1    | Identify the report as a scoping review.                                                                                                                                                                                                                                                                   | 1                  |
| <b>ABSTRACT</b>                                       |      |                                                                                                                                                                                                                                                                                                            |                    |
| Structured summary                                    | 2    | Provide a structured summary that includes (as applicable): background, objectives, eligibility criteria, sources of evidence, charting methods, results, and conclusions that relate to the review questions and objectives.                                                                              | 1                  |
| <b>INTRODUCTION</b>                                   |      |                                                                                                                                                                                                                                                                                                            |                    |
| Rationale                                             | 3    | Describe the rationale for the review in the context of what is already known. Explain why the review questions/objectives lend themselves to a scoping review approach.                                                                                                                                   | 2                  |
| Objectives                                            | 4    | Provide an explicit statement of the questions and objectives being addressed with reference to their key elements (e.g., population or participants, concepts, and context) or other relevant key elements used to conceptualize the review questions and/or objectives.                                  | 2                  |
| <b>METHODS</b>                                        |      |                                                                                                                                                                                                                                                                                                            |                    |
| Protocol and registration                             | 5    | Indicate whether a review protocol exists; state if and where it can be accessed (e.g., a Web address); and if available, provide registration information, including the registration number.                                                                                                             | 3                  |
| Eligibility criteria                                  | 6    | Specify characteristics of the sources of evidence used as eligibility criteria (e.g., years considered, language, and publication status), and provide a rationale.                                                                                                                                       | 3                  |
| Information sources*                                  | 7    | Describe all information sources in the search (e.g., databases with dates of coverage and contact with authors to identify additional sources), as well as the date the most recent search was executed.                                                                                                  | 3                  |
| Search                                                | 8    | Present the full electronic search strategy for at least 1 database, including any limits used, such that it could be repeated.                                                                                                                                                                            | 3-4                |
| Selection of sources of evidence†                     | 9    | State the process for selecting sources of evidence (i.e., screening and eligibility) included in the scoping review.                                                                                                                                                                                      | 4                  |
| Data charting process‡                                | 10   | Describe the methods of charting data from the included sources of evidence (e.g., calibrated forms or forms that have been tested by the team before their use, and whether data charting was done independently or in duplicate) and any processes for obtaining and confirming data from investigators. | 4                  |
| Data items                                            | 11   | List and define all variables for which data were sought and any assumptions and simplifications made.                                                                                                                                                                                                     | 4                  |
| Critical appraisal of individual sources of evidence§ | 12   | If done, provide a rationale for conducting a critical appraisal of included sources of evidence; describe the methods used and how this information was used in any data synthesis (if appropriate).                                                                                                      | 4                  |
| Synthesis of results                                  | 13   | Describe the methods of handling and summarizing the data that were charted.                                                                                                                                                                                                                               | 4                  |

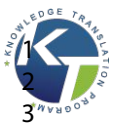

| SECTION                                       | ITEM | PRISMA-ScR CHECKLIST ITEM                                                                                                                                                                       | REPORTED ON PAGE # |
|-----------------------------------------------|------|-------------------------------------------------------------------------------------------------------------------------------------------------------------------------------------------------|--------------------|
| <b>RESULTS</b>                                |      |                                                                                                                                                                                                 |                    |
| Selection of sources of evidence              | 14   | Give numbers of sources of evidence screened, assessed for eligibility, and included in the review, with reasons for exclusions at each stage, ideally using a flow diagram.                    |                    |
| Characteristics of sources of evidence        | 15   | For each source of evidence, present characteristics for which data were charted and provide the citations.                                                                                     |                    |
| Critical appraisal within sources of evidence | 16   | If done, present data on critical appraisal of included sources of evidence (see item 12).                                                                                                      |                    |
| Results of individual sources of evidence     | 17   | For each included source of evidence, present the relevant data that were charted that relate to the review questions and objectives.                                                           |                    |
| Synthesis of results                          | 18   | Summarize and/or present the charting results as they relate to the review questions and objectives.                                                                                            |                    |
| <b>DISCUSSION</b>                             |      |                                                                                                                                                                                                 |                    |
| Summary of evidence                           | 19   | Summarize the main results (including an overview of concepts, themes, and types of evidence available), link to the review questions and objectives, and consider the relevance to key groups. |                    |
| Limitations                                   | 20   | Discuss the limitations of the scoping review process.                                                                                                                                          |                    |
| Conclusions                                   | 21   | Provide a general interpretation of the results with respect to the review questions and objectives, as well as potential implications and/or next steps.                                       |                    |
| <b>FUNDING</b>                                |      |                                                                                                                                                                                                 |                    |
| Funding                                       | 22   | Describe sources of funding for the included sources of evidence, as well as sources of funding for the scoping review. Describe the role of the funders of the scoping review.                 |                    |

JB1 = Joanna Briggs Institute; PRISMA-ScR = Preferred Reporting Items for Systematic reviews and Meta-Analyses extension for Scoping Reviews.

\* Where *sources of evidence* (see second footnote) are compiled from, such as bibliographic databases, social media platforms, and Web sites.

† A more inclusive/heterogeneous term used to account for the different types of evidence or data sources (e.g., quantitative and/or qualitative research, expert opinion, and policy documents) that may be eligible in a scoping review as opposed to only studies. This is not to be confused with *information sources* (see first footnote).

‡ The frameworks by Arksey and O'Malley (6) and Levac and colleagues (7) and the JBI guidance (4, 5) refer to the process of data extraction in a scoping review as data charting.

§ The process of systematically examining research evidence to assess its validity, results, and relevance before using it to inform a decision. This term is used for items 12 and 19 instead of "risk of bias" (which is more applicable to systematic reviews of interventions) to include and acknowledge the various sources of evidence that may be used in a scoping review (e.g., quantitative and/or qualitative research, expert opinion, and policy document).

From: Tricco AC, Lillie E, Zarin W, O'Brien KK, Colquhoun H, Levac D, et al. PRISMA Extension for Scoping Reviews (PRISMA-ScR): Checklist and Explanation. *Ann Intern Med*. 2018;169:467–473. doi: [10.7326/M18-0850](https://doi.org/10.7326/M18-0850).

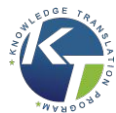

**St. Michael's**  
Inspired Care.  
Inspiring Science.

1  
2  
3  
4  
5  
6  
7  
8  
9  
10  
11  
12  
13  
14  
15  
16  
17  
18  
19  
20  
21  
22  
23  
24  
25  
26  
27  
28  
29  
30  
31  
32  
33  
34  
35  
36  
37  
38  
39  
40  
41  
42  
43  
44  
45  
46  
47  
48  
49  
50  
51  
52  
53  
54  
55  
56  
57  
58  
59  
60

For peer review only

# BMJ Open

## Community Engagement Approaches for Malaria Prevention, Control and Elimination: A Scoping Review Protocol

|                                 |                                                                                                                                                                                                                                                                                                                                                                                                      |
|---------------------------------|------------------------------------------------------------------------------------------------------------------------------------------------------------------------------------------------------------------------------------------------------------------------------------------------------------------------------------------------------------------------------------------------------|
| Journal:                        | <i>BMJ Open</i>                                                                                                                                                                                                                                                                                                                                                                                      |
| Manuscript ID                   | bmjopen-2021-049812.R2                                                                                                                                                                                                                                                                                                                                                                               |
| Article Type:                   | Protocol                                                                                                                                                                                                                                                                                                                                                                                             |
| Date Submitted by the Author:   | 20-Sep-2021                                                                                                                                                                                                                                                                                                                                                                                          |
| Complete List of Authors:       | Awasthi, Kiran Raj; Curtin University - Perth Bentley Campus, Curtin School of Population Health<br>Jancey, Jonine; Curtin University - Perth Bentley Campus, Curtin School of Population Health<br>Clements, Archie ; Curtin University - Perth Bentley Campus, Curtin School of Population Health<br>Leavy, Justine ; Curtin University - Perth Bentley Campus, Curtin School of Population Health |
| <b>Primary Subject Heading</b>: | Infectious diseases                                                                                                                                                                                                                                                                                                                                                                                  |
| Secondary Subject Heading:      | Epidemiology, Global health, Infectious diseases, Public health                                                                                                                                                                                                                                                                                                                                      |
| Keywords:                       | Public health < INFECTIOUS DISEASES, Tropical medicine < INFECTIOUS DISEASES, PUBLIC HEALTH, Quality in health care < HEALTH SERVICES ADMINISTRATION & MANAGEMENT, Epidemiology < INFECTIOUS DISEASES, Epidemiology < TROPICAL MEDICINE                                                                                                                                                              |
|                                 |                                                                                                                                                                                                                                                                                                                                                                                                      |

SCHOLARONE™  
Manuscripts



I, the Submitting Author has the right to grant and does grant on behalf of all authors of the Work (as defined in the below author licence), an exclusive licence and/or a non-exclusive licence for contributions from authors who are: i) UK Crown employees; ii) where BMJ has agreed a CC-BY licence shall apply, and/or iii) in accordance with the terms applicable for US Federal Government officers or employees acting as part of their official duties; on a worldwide, perpetual, irrevocable, royalty-free basis to BMJ Publishing Group Ltd ("BMJ") its licensees and where the relevant Journal is co-owned by BMJ to the co-owners of the Journal, to publish the Work in this journal and any other BMJ products and to exploit all rights, as set out in our [licence](#).

The Submitting Author accepts and understands that any supply made under these terms is made by BMJ to the Submitting Author unless you are acting as an employee on behalf of your employer or a postgraduate student of an affiliated institution which is paying any applicable article publishing charge ("APC") for Open Access articles. Where the Submitting Author wishes to make the Work available on an Open Access basis (and intends to pay the relevant APC), the terms of reuse of such Open Access shall be governed by a Creative Commons licence – details of these licences and which [Creative Commons](#) licence will apply to this Work are set out in our licence referred to above.

Other than as permitted in any relevant BMJ Author's Self Archiving Policies, I confirm this Work has not been accepted for publication elsewhere, is not being considered for publication elsewhere and does not duplicate material already published. I confirm all authors consent to publication of this Work and authorise the granting of this licence.



1  
2  
3  
4 1 **Title: Community Engagement Approaches for Malaria Prevention, Control and Elimination:**  
5 2 **A Scoping Review Protocol**  
6

7  
8 3 Kiran Raj Awasthi <sup>1,\*</sup>, Jonine Jancey <sup>1</sup>, Archie Clements <sup>1</sup>, Justine E. Leavy <sup>1</sup>  
9

10 4 <sup>1</sup> Faculty of Health Sciences, Curtin University, GPO Box U1987, Perth, WA 6845, Australia  
11

12 5 \*Correspondence: [kiran.awasthi@curtin.edu.au](mailto:kiran.awasthi@curtin.edu.au); Tel.: +61-424906590  
13

14 6 **ORCID ID:** Kiran Raj Awasthi <https://orcid.org/0000-0001-6448-7696>  
15  
16 7

17  
18 8 **Key words:** community engagement; community participation; malaria; prevention; control;  
19 9 elimination  
20  
21

22  
23 10 (Word count: 2,200)  
24  
25  
26  
27  
28  
29  
30  
31  
32  
33  
34  
35  
36  
37  
38  
39  
40  
41  
42  
43  
44  
45  
46  
47  
48  
49  
50  
51  
52  
53  
54  
55  
56  
57  
58  
59  
60

1

2

3

4

5

6

7

8

9

10

11

12

13

14

15

16

17

18

19

20

21

22

23

24

25

26

27

28

29

30

31

32

33

34

35

36

37

38

39

40

41

42

43

44

45

46

47

48

49

50

51

52

53

54

55

56

57

58

59

60

**Title: Community Engagement Approaches for Malaria Prevention, Control and Elimination:  
A Scoping Review Protocol**

Kiran Raj Awasthi <sup>1,\*</sup>, Jonine Jancey <sup>1</sup>, Archie Clements <sup>1</sup>, Justine E. Leavy <sup>1</sup>

<sup>1</sup> School of Public Health, Curtin University, GPO Box U1987, Perth, WA 6845, Australia

\*Correspondence: [kiran.awasthi@curtin.edu.au](mailto:kiran.awasthi@curtin.edu.au); Tel.: +61-424906590

**Abstract:** Community engagement (CE) is important for malaria prevention, control, and ultimately elimination. As the decline of malaria has plateaued over the last five years, strengthening CE approaches will be necessary to enhance health promotion practice and policy to drive malaria transmission down further. Countries have adopted a wide range of public health intervention approaches for malaria prevention and control that best suit their context. This review will examine the existing evidence on the various CE approaches adopted by malaria programs across the world and their outcomes.

**Methodology and Analysis:** The review methodology will follow the updated Joanna Briggs Institute guide for scoping review, 2017, which is based on the framework developed by Arksey and O'Malley and further developed by Levac Colquhoun and O'Brien. Proquest, Web of Knowledge, and Medline will be searched for publications from January 2000 to 31<sup>st</sup> March 2021 while Google search engine will be used to find any grey literature. The eligibility criteria will be as follows: review will include primary studies written in the English language using appropriate study designs and methods, including quantitative, qualitative and mixed methods designs; and case, program or project reports. Information on CE approaches designed specifically for malaria prevention, control, elimination and their outcomes will be explored. Subheadings and free text terms for "community engagement" and "malaria" will

1 be used for the search. The article screening and data extraction will be examined by two  
2 reviewers after the initial search and any disputes will be resolved by a third reviewer  
3 through discussion. The PRISMA extension for scoping reviews (PRISMA\_ScR) guide will  
4 be used to present the review methods and the results from the search. The scoping review  
5 results will identify and map the available evidences, sources of information and research  
6 gaps in the area of CE as one approach for malaria prevention, control and/or elimination.

7 **Ethics and Dissemination:** This study only aims to review secondary sources and does not  
8 require human research ethics committee approval. The findings of the scoping review will  
9 be submitted to a peer reviewed journal for wider dissemination.

10 This is an Open Access article distributed in accordance with the Creative Commons  
11 Attribution Non Commercial (CC BY-NC 4.0) license, which permits others to distribute,  
12 remix, adapt, build upon this work non-commercially, and license their derivative works on

### 13 **Strengths and limitations of the study**

- 14 • To our knowledge, this is the first scoping review to be undertaken on CE approaches  
15 for malaria prevention, control and elimination.
- 16 • The University Health Science reference librarian will assist in developing a search  
17 strategy for the scoping review, a strength of the study.
- 18 • The review will include peer reviewed published primary sources in English, therefore  
19 publications in languages other than English, unpublished articles, and multi-country  
20 studies will be excluded. a limitation of this study.

## 21 **INTRODUCTION**

### 22 **INTRODUCTION**

23 Malaria, a vector borne disease, remains a major public health challenge contributing to an  
24 estimated 228 million cases and 400,000 deaths annually worldwide.<sup>1</sup> Globally, between 2010  
25 and 2014, there was a 70 % decrease in malaria incidence, however, in the last five years the  
26 progress towards further reduction has been relatively static.<sup>2</sup> The earlier decrease in cases  
27 was attributed to scaling up of routine interventions such as free distribution of long-lasting  
28 insecticidal nets (LLINs) or insecticide treated nets (ITNs), periodic indoor residual spraying  
29 (IRS), prompt treatment of diagnosed cases, and use of Artemisinin based Combination  
30 Therapy (ACT) for the treatment of *Plasmodium falciparum* malaria.<sup>1,3-5</sup> Whilst some countries  
focus their strategies on malaria prevention by enabling and promoting use of LLINs/ IRS/

1 larvicides and chemoprophylaxis alongside malaria control programs that target a reduction in  
2 the disease burden to a level where it is no longer a public health concern; countries with fewer  
3 malaria cases aim for elimination to ensure sustained zero local transmission of malaria in the  
4 population within a set geographic boundary through a strengthened surveillance system.<sup>1</sup>

5 Community engagement (CE) is defined as “a process of working collaboratively with groups  
6 of people who are affiliated by geographic proximity, special interests, or similar situations,  
7 with respect to issues affecting their wellbeing” (p9).<sup>6</sup> CE has been adopted especially by  
8 Lower and Middle Income Countries (LMICs) in a quest to reach elimination of malaria by  
9 2030, consistent with the World Health Organization Global Malaria Strategy 2016–2030.<sup>7,8</sup>  
10 CE has been used to co-design public health interventions and approaches for prevention and  
11 control of malaria in a variety of countries in a range of national programs, such as: mass drug  
12 administration for malaria prevention in Myanmar and Laos;<sup>9,10</sup> increasing the use of LLINs  
13 and promoting early testing and treatment in Cambodia and Kenya;<sup>11</sup> and improving access  
14 to diagnosis and treatment in communities in Zambia.<sup>12</sup> A variety of activities have been  
15 implemented for malaria prevention, control, and elimination based on CE. These include  
16 formation of community leadership groups comprising local decision-makers, elderly and  
17 youth; drama campaigns and health education programs conducted in local languages and  
18 delivered in schools and churches; house-to-house visits by community health volunteers to  
19 improve early detection and timely treatment in rural areas with high levels of migration; and  
20 participatory action malaria research led by the community.<sup>9-12</sup>

21 Health interventionists’ use CE to harness communities in health promotion practice, research  
22 and policy related decision making to advance knowledge and support behavioural and  
23 environmental change to improve health outcomes.<sup>13</sup> Public health interventions can  
24 incorporate CE in different forms: providing information; consulting; joint decision-making;  
25 acting collaboratively; and supporting the community interests independently.<sup>14</sup> CE can be  
26 effective in dealing with health inequalities especially among disadvantaged groups who are  
27 challenged by structural, geographical, cultural, financial and language barriers.<sup>15</sup>  
28 Internationally a range of CE approaches that best suit the context and the target community  
29 have been used to raise awareness of malaria prevention, and enable year-round round  
30 access to free testing and treatment in rural hard-to-reach populations, whilst developing local  
31 level ownership. For example in Malawi the community based health animators (volunteers  
32 who conduct peer education in Malawi) have been used by the national malaria program as  
33 peer influencers to improve awareness and promote positive behaviour change in the  
34 community<sup>16</sup>. In Nigeria integrated community case management has been used to detect  
35 and treat malaria cases in remote areas using trained local community health workers,

1  
2  
3  
4 1 minimizing travel time and the cost for patients<sup>17</sup>. Similarly, in Cameroon and Cambodia local  
5  
6 2 volunteers and village malaria workers have been used to conduct proactive and reactive case  
7  
8 3 detection in communities to prevent transmission<sup>11,18</sup>, whilst the Interactive Malaria Awareness  
9  
10 4 Program (MAP) in South Africa have successfully used home-based care workers to form  
11  
12 5 local level partnerships and to also educate communities on malaria prevention and control<sup>19</sup>.  
13  
14 6 All these different CE approaches have contributed to improved awareness, early detection of  
15  
16 7 cases and improved access and wider community acceptance of malaria prevention and  
17  
18 8 treatment in the afore mentioned countries.<sup>16-19</sup>

19  
20 9 This paper describes the protocol for a scoping review that aims to describe CE approaches  
21  
22 10 targeting the prevention, control or elimination of malaria that have been/ or are being  
23  
24 11 implemented by countries.

## 25 12 REVIEW OBJECTIVES

26  
27 13 The objectives of the review are to map the available evidence on the types of CE  
28  
29 14 approaches for 1) malaria prevention; 2) malaria control; and 3) malaria elimination; and 4)  
30  
31 15 describe the outcomes of the CE approaches.

## 32 16 METHODS

### 33 17 Protocols and Registration

34  
35 18 During a preliminary search, a 2016 systematic review was found that focused on one  
36  
37 19 element of malaria prevention ([https://doi: 10.1186/s12936-016-1593-y](https://doi:10.1186/s12936-016-1593-y): Malaria Journal).<sup>20</sup>  
38  
39 20 However, no scoping review on CE has been conducted to date that incorporates different  
40  
41 21 approaches to all components of malaria prevention, control and elimination across  
42  
43 22 countries.

### 44 23 Patient and Public Involvement

45  
46 24 No patient Involved  
47  
48 25

### 49 26 Eligibility Criteria

50  
51 27 The review will only consider interventions studies published from 2000 onwards till the end  
52  
53 28 of March 2021, a period encompassing two important landmarks, the advent of the Millennium  
54  
55 29 Development Goals (2000-2014) and the Sustainable Development Goals (2015-2030).<sup>21</sup>

56  
57 30 The evidence will be included if the sources are:

- 58 31 • Primary studies;
- 59  
60 32 • Written in the English language;

- 1 • Using appropriate study designs and methods, including quantitative, qualitative and
- 2 mixed methods designs; and case, program or project reports;
- 3 • Providing information on CE approaches designed specifically for malaria prevention,
- 4 control and/or elimination.

5  
6 The evidence will be excluded if the sources are:

- 7 • Secondary studies including systematic reviews;
- 8 • Published in languages other than English;
- 9 • Providing information on CE approaches for diseases or health issues other than
- 10 malaria;
- 11 • Multi-country studies will be excluded;
- 12 • Providing anecdotal evidence without a description of the study design and methods.

### 13 14 **Information Sources and Search**

15  
16 The search strategy will involve searching the databases for peer-reviewed published  
17 literature focusing on CE approaches conducted for malaria prevention, control or  
18 elimination. The search methodology will follow the updated Joanna Briggs Institute guide for  
19 scoping reviews in 2017,<sup>22, 23</sup> which is based on the framework developed by Arksey and  
20 O'Malley<sup>24</sup> and further developed by Levac Colquhoun and O'Brien.<sup>25</sup> A scoping review is a  
21 valid process of synthesizing evidence on a given topic, providing an excerpt of the volume  
22 of the literature or studies without seeking to analyse it.<sup>26</sup> Primarily an exploratory approach,  
23 scoping reviews can shed light on the types of evidence available, the way studies have  
24 been conducted and help identify and map the evidence that is available in the area of  
25 interest.<sup>26,27</sup>

26 Databases including Proquest, Web of Science, and Medline (OVID) will be searched using  
27 key words: "community engagement" OR "community participation" OR "community  
28 involvement" OR "public engagement" OR "community mobilization" OR "social  
29 mobilization" OR "community action" OR "community empowerment" OR "community led"  
30 OR "community conversation" AND "prevention", "control", "elimination" AND "malaria" .  
31 Similarly, advanced Google search will be used to identify grey literature including case,  
32 program or project reports using the same key words. The key words have been defined  
33 based on the objectives of the study. Initially the search will be limited to the article title and  
34 abstract for studies published between January 2000 and March 31 2021. The search will be  
35 further streamlined by searching for citations from the reference lists of papers selected from

1 the initial search. For papers not available online, the first author (K.R.A.) will contact the  
2 lead author of the publication via email requesting a copy of the paper to review.

#### 4 **Selection of Sources of Evidence**

5 The title and the abstract obtained from the search results will be examined by two reviewers  
6 after the initial search. In the first stage of the study selection, two reviewers (J.J., J.E.L.)  
7 independent of one another will examine the title and abstract from search results obtained  
8 by K.R.A. The selection of the final studies will be agreed upon by three reviewers (K.R.A.;  
9 J.J.; J.E.L.). During the final selection process, any differences regarding inclusion and  
10 exclusion of papers among the three reviewers will be discussed, and a fourth reviewer  
11 (A.C.) will be called upon to reach consensus.

#### 13 **Data Charting Process**

14 The data charting process will map the findings according to the attributes: author; date/year  
15 of publication; country/ site; aim/ objectives; study population; sample size; study design;  
16 phases (prevention, control, elimination); and outcomes. The charting will be undertaken by  
17 K.R.A and will be reviewed by two reviewers (J.J. and J.E.L.). Any disputes or differences  
18 will be resolved by the fourth reviewer (A.C.).

#### 20 **Presentation of the Results**

21 The PRISMA extension for scoping reviews (PRISMA\_ScR) will be used to present the  
22 review methods and the search results.<sup>28</sup> The 22 items checklist for reporting systematic  
23 reviews comprising two optional items (critical appraisal of sources and summary of the  
24 evidences) will be followed. The items include eligibility criteria, the search approach,  
25 methods of selecting the evidence and the data charting process. The search process and  
26 the evidence flow across various stages of the study will be presented visually using an  
27 additional diagram. Furthermore, the selected evidence based on the source, study  
28 characteristics and the major findings will be mapped and presented in tabular form. The  
29 results will be synthesized in congruence with the scoping review objectives and a narrative  
30 description will be presented. The main findings will be synthesized to highlight the  
31 limitations and provide an analysis of CE approaches paving the way for future research  
32 opportunities.

#### 35 **Expected Results**

1  
2  
3  
4 1 This scoping review aims to identify the available evidence, sources of information and  
5 2 research gaps in the area of CE as one approach for malaria prevention, control and/or  
6 3 elimination. The results from this review will inform future practice and research in this area.  
7  
8  
9 4

## 5 **ETHICS AND DISSEMINATION**

11 6 This study only aims to review the secondary sources and does not require human research  
12 7 ethics committee approval. Nonetheless being a component of a mixed methods study,  
13 8 human ethics approval has been obtained from Nepal Health Research Council (ERB  
14 9 632/2020, Ref. No. 1287) and Curtin University's Human Research Ethics Committee  
15 10 number HRE2020-0701. The findings of the scoping review will be submitted to a peer  
16 11 reviewed journal for wider dissemination.  
17  
18  
19  
20  
21  
22  
23  
24

## 14 **REFERENCES**

- 25  
26  
27 16 1. World Health Organization. World malaria report 2019. Who Geneva 2019.  
28 17 2. Panda S, Swaminathan S, Hyder KA, et al. Drug resistance in malaria, tuberculosis,  
29 18 and HIV in South East Asia: biology, programme, and policy considerations. *BMJ*.  
30 19 2017;358:j3545.  
31  
32 20 3. World Health Organization. World malaria report 2018. WHO Geneva 2018.  
33 21 4. World Health Organization. WHA68 2: Global technical strategy and targets for  
34 22 malaria 2016–2030. World Health Organization 2015.  
35 23 5. Bhatt S, Weiss D, Cameron E, et al. The effect of malaria control on Plasmodium  
36 24 falciparum in Africa between 2000 and 2015. *Nature*. 2015;526(7572):207-11.  
37 25 6. Control for Disease Control and Prevention. Principles of community engagement.  
38 26 CDC/ATSDR Committee on Community Engagement Atlanta, GA. 1997.  
39 27 7. Epidemiology and Disease Control Division. Nepal Malaria Strategic Plan 2014-2025.  
40 28 Department of Health Services 2016.  
41 29 8. World Health Organization. Global technical strategy and targets for malaria 2016–  
42 30 2030. WHO Geneva 2015.  
43 31 9. Adhikari B, Pell C, Phommasone K, et al. Elements of effective community  
44 32 engagement: lessons from a targeted malaria elimination study in Lao PDR (Laos). *Global*  
45 33 *health action*. 2017;10(1):1366136.  
46 34 10. Kajechiwa L, Thwin MM, Nosten S, et al. Community engagement for the rapid  
47 35 elimination of malaria: the case of Kayin State, Myanmar. *Wellcome Open Res*. 2017;2:59.  
48  
49  
50  
51  
52  
53  
54  
55  
56  
57  
58  
59  
60



- 1  
2  
3  
4 1 11. Lim R, Tripura R, Peto TJ, et al. Drama as a community engagement strategy for  
5 2 malaria in rural Cambodia. *Wellcome Open Res.* 2017;2:95.  
6  
7 3 12. Gordon A, Vander Meulen RJ, et al. The 2019 Isdell: Flowers Cross Border Malaria  
8 4 Initiative Round Table: community engagement in the context of malaria elimination. *Malar J.*  
9 5 2019;18:432.  
10  
11 6 13. Wallerstein N, Minkler M, Carter-Edwards L, et al. Improving health through  
12 7 community engagement, community organization, and community building. *Health behavior:*  
13 8 *theory, research and practice.* 2015;5.  
14  
15 9 14. O'Mara-Eves, A., G. Brunton, S. Oliver, J. Kavanagh, F. Jamal and J. Thomas  
16 10 (2015). "The effectiveness of community engagement in public health interventions for  
17 11 disadvantaged groups: a meta-analysis." *BMC public health* 15(1): 1-23.  
18  
19 12 15. Cyril S, Smith BJ, Possamai-Inesedy A, et al. Exploring the role of community  
20 13 engagement in improving the health of disadvantaged populations: a systematic review.  
21 14 *Global health action.* 2015;8(1):29842.  
22  
23 15 16. Kaunda-Khangamwa, B. N., H. Van Den Berg, R. S. McCann, A. Kabaghe, W.  
24 16 Takken, K. Phiri, M. Van Vugt and L. Manda-Taylor (2019). "The role of health animators in  
25 17 malaria control: a qualitative study of the health animator (HA) approach within the Majete  
26 18 malaria project (MMP) in Chikwawa District, Malawi." *BMC Health services research* 19(1):  
27 19 1-16.  
28  
29 17. Alegbeleye, A., J. Dada, O. Oresanya, J. Jiya, H. Counihan, P. Gimba, L. Ozor and  
30 20 K. Maxwell (2019). "Community engagement and mobilisation of local resources to support  
31 21 integrated Community Case Management of childhood illnesses in Niger State, Nigeria."  
32 22 *Journal of global health* 9(1).  
33  
34 23 18. Bekolo, C. E. and T. D. A. Williams (2019). "Adding proactive and reactive case  
35 24 detection into the integrated community case management system to optimise diagnosis and  
36 25 treatment of malaria in a high transmission setting of Cameroon: an observational quality  
37 26 improvement study." *BMJ open* 9(6): e026678.  
38  
39 27 19. Cox, S. N., K. E. Guidera, M. J. Simon, B. A. S. Nonyane, W. Brieger, M. S.  
40 28 Bornman and P. S. Kruger (2018). "Interactive malaria education intervention and its effect  
41 29 on community participant knowledge: the malaria awareness program in Vhembe district,  
42 30 Limpopo, South Africa." *International quarterly of community health education* 38(2): 147-  
43 31 158.  
44  
45  
46  
47  
48  
49  
50  
51  
52  
53  
54  
55  
56  
57  
58  
59  
60

- 1  
2  
3  
4 1 20. Adhikari B, James N, Newby G, et al. Community engagement and population  
5 2 coverage in mass anti-malarial administrations: a systematic literature review. *Malar J*.  
6 3 2016;15(1):523.  
7  
8 4 21. Sachs JD. From millennium development goals to sustainable development goals.  
9 5 *The Lancet*. 2012;379(9832):2206-11.  
10 6 22. Peters M, Godfrey C, Mclnerney P, et al. Methodology for JBI scoping reviews. The  
11 7 Joanna Briggs Institute Reviewers manual 2017: The Joanna Briggs Institute; 2017. p. 3-24.  
12 8 23. Peters MD, Godfrey CM, Khalil H, et al. Guidance for conducting systematic scoping  
13 9 reviews. *International journal of evidence-based healthcare*. 2015;13(3):141-146.  
14 10 24. Arksey H, O'Malley L. Scoping studies: towards a methodological framework.  
15 11 *International Journal of Social Research Methodology*. 2005;8(1):19-32.  
16 12 25. Levac D, Colquhoun H, O'Brien KK. Scoping studies: advancing the methodology.  
17 13 *Implementation Science*. 2010;5:69.  
18 14 26. Munn Z, Peters MDJ, Stern C, et al. Systematic review or scoping review? Guidance  
19 15 for authors when choosing between a systematic or scoping review approach. *BMC Med*  
20 16 *Res Methodol*. 2018;18(1):1-7.  
21 17 27. Pham MT, Rajić A, Greig JD, et al. A scoping review of scoping reviews: advancing  
22 18 the approach and enhancing the consistency. *Res Synth Methods*. 2014;5(4):371-85.  
23 19 28. Tricco AC, Lillie E, Zarin W, et al. PRISMA extension for scoping reviews (PRISMA-  
24 20 ScR): checklist and explanation. *Annals of internal medicine*. 2018;169(7):467-73.

21

## 22 ACKNOWLEDGEMENTS

23 The authors would like to acknowledge the input of Vanessa Varis, Health Sciences  
24 reference librarian for her support in the designing the initial search strategy.

25

## 26 AUTHOR CONTRIBUTIONS

27 KRA conceptualized the topic and wrote the original draft. JL, AC and JJ supervised the  
28 writing process and were involved in review and editing of the manuscript.

29

## 30 FUNDING

31 This research received no specific grant from any funding agency in the public, commercial  
32 or not for profit sectors.

33

## 34 CONFLICT OF INTEREST

35 The authors declare no conflict of interest.

36

1  
2  
3 1 **ORCID ID**

4 2 Kiran Raj Awasthi <https://orcid.org/0000-0001-6448-7696>

6 3

8 4 (Word count: 2,200)

10 5

12 6

14 7

17  
18  
19  
20  
21  
22  
23  
24  
25  
26  
27  
28  
29  
30  
31  
32  
33  
34  
35  
36  
37  
38  
39  
40  
41  
42  
43  
44  
45  
46  
47  
48  
49  
50  
51  
52  
53  
54  
55  
56  
57  
58  
59  
60

For peer review only

## Preferred Reporting Items for Systematic reviews and Meta-Analyses extension for Scoping Reviews (PRISMA-ScR) Checklist

| SECTION                                               | ITEM | PRISMA-ScR CHECKLIST ITEM                                                                                                                                                                                                                                                                                  | REPORTED ON PAGE # |
|-------------------------------------------------------|------|------------------------------------------------------------------------------------------------------------------------------------------------------------------------------------------------------------------------------------------------------------------------------------------------------------|--------------------|
| <b>TITLE</b>                                          |      |                                                                                                                                                                                                                                                                                                            |                    |
| Title                                                 | 1    | Identify the report as a scoping review.                                                                                                                                                                                                                                                                   | 1                  |
| <b>ABSTRACT</b>                                       |      |                                                                                                                                                                                                                                                                                                            |                    |
| Structured summary                                    | 2    | Provide a structured summary that includes (as applicable): background, objectives, eligibility criteria, sources of evidence, charting methods, results, and conclusions that relate to the review questions and objectives.                                                                              | 1                  |
| <b>INTRODUCTION</b>                                   |      |                                                                                                                                                                                                                                                                                                            |                    |
| Rationale                                             | 3    | Describe the rationale for the review in the context of what is already known. Explain why the review questions/objectives lend themselves to a scoping review approach.                                                                                                                                   | 2                  |
| Objectives                                            | 4    | Provide an explicit statement of the questions and objectives being addressed with reference to their key elements (e.g., population or participants, concepts, and context) or other relevant key elements used to conceptualize the review questions and/or objectives.                                  | 2                  |
| <b>METHODS</b>                                        |      |                                                                                                                                                                                                                                                                                                            |                    |
| Protocol and registration                             | 5    | Indicate whether a review protocol exists; state if and where it can be accessed (e.g., a Web address); and if available, provide registration information, including the registration number.                                                                                                             | 3                  |
| Eligibility criteria                                  | 6    | Specify characteristics of the sources of evidence used as eligibility criteria (e.g., years considered, language, and publication status), and provide a rationale.                                                                                                                                       | 3                  |
| Information sources*                                  | 7    | Describe all information sources in the search (e.g., databases with dates of coverage and contact with authors to identify additional sources), as well as the date the most recent search was executed.                                                                                                  | 3                  |
| Search                                                | 8    | Present the full electronic search strategy for at least 1 database, including any limits used, such that it could be repeated.                                                                                                                                                                            | 3-4                |
| Selection of sources of evidence†                     | 9    | State the process for selecting sources of evidence (i.e., screening and eligibility) included in the scoping review.                                                                                                                                                                                      | 4                  |
| Data charting process‡                                | 10   | Describe the methods of charting data from the included sources of evidence (e.g., calibrated forms or forms that have been tested by the team before their use, and whether data charting was done independently or in duplicate) and any processes for obtaining and confirming data from investigators. | 4                  |
| Data items                                            | 11   | List and define all variables for which data were sought and any assumptions and simplifications made.                                                                                                                                                                                                     | 4                  |
| Critical appraisal of individual sources of evidence§ | 12   | If done, provide a rationale for conducting a critical appraisal of included sources of evidence; describe the methods used and how this information was used in any data synthesis (if appropriate).                                                                                                      | 4                  |
| Synthesis of results                                  | 13   | Describe the methods of handling and summarizing the data that were charted.                                                                                                                                                                                                                               | 4                  |



| SECTION                                       | ITEM | PRISMA-ScR CHECKLIST ITEM                                                                                                                                                                       | REPORTED ON PAGE # |
|-----------------------------------------------|------|-------------------------------------------------------------------------------------------------------------------------------------------------------------------------------------------------|--------------------|
| <b>RESULTS</b>                                |      |                                                                                                                                                                                                 |                    |
| Selection of sources of evidence              | 14   | Give numbers of sources of evidence screened, assessed for eligibility, and included in the review, with reasons for exclusions at each stage, ideally using a flow diagram.                    |                    |
| Characteristics of sources of evidence        | 15   | For each source of evidence, present characteristics for which data were charted and provide the citations.                                                                                     |                    |
| Critical appraisal within sources of evidence | 16   | If done, present data on critical appraisal of included sources of evidence (see item 12).                                                                                                      |                    |
| Results of individual sources of evidence     | 17   | For each included source of evidence, present the relevant data that were charted that relate to the review questions and objectives.                                                           |                    |
| Synthesis of results                          | 18   | Summarize and/or present the charting results as they relate to the review questions and objectives.                                                                                            |                    |
| <b>DISCUSSION</b>                             |      |                                                                                                                                                                                                 |                    |
| Summary of evidence                           | 19   | Summarize the main results (including an overview of concepts, themes, and types of evidence available), link to the review questions and objectives, and consider the relevance to key groups. |                    |
| Limitations                                   | 20   | Discuss the limitations of the scoping review process.                                                                                                                                          |                    |
| Conclusions                                   | 21   | Provide a general interpretation of the results with respect to the review questions and objectives, as well as potential implications and/or next steps.                                       |                    |
| <b>FUNDING</b>                                |      |                                                                                                                                                                                                 |                    |
| Funding                                       | 22   | Describe sources of funding for the included sources of evidence, as well as sources of funding for the scoping review. Describe the role of the funders of the scoping review.                 |                    |

JB1 = Joanna Briggs Institute; PRISMA-ScR = Preferred Reporting Items for Systematic reviews and Meta-Analyses extension for Scoping Reviews.

\* Where *sources of evidence* (see second footnote) are compiled from, such as bibliographic databases, social media platforms, and Web sites.

† A more inclusive/heterogeneous term used to account for the different types of evidence or data sources (e.g., quantitative and/or qualitative research, expert opinion, and policy documents) that may be eligible in a scoping review as opposed to only studies. This is not to be confused with *information sources* (see first footnote).

‡ The frameworks by Arksey and O'Malley (6) and Levac and colleagues (7) and the JBI guidance (4, 5) refer to the process of data extraction in a scoping review as data charting.

§ The process of systematically examining research evidence to assess its validity, results, and relevance before using it to inform a decision. This term is used for items 12 and 19 instead of "risk of bias" (which is more applicable to systematic reviews of interventions) to include and acknowledge the various sources of evidence that may be used in a scoping review (e.g., quantitative and/or qualitative research, expert opinion, and policy document).

From: Tricco AC, Lillie E, Zarin W, O'Brien KK, Colquhoun H, Levac D, et al. PRISMA Extension for Scoping Reviews (PRISMA-ScR): Checklist and Explanation. *Ann Intern Med.* 2018;169:467–473. doi: [10.7326/M18-0850](https://doi.org/10.7326/M18-0850).

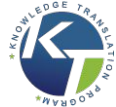

**St. Michael's**  
Inspired Care.  
Inspiring Science.

1  
2  
3  
4  
5  
6  
7  
8  
9  
10  
11  
12  
13  
14  
15  
16  
17  
18  
19  
20  
21  
22  
23  
24  
25  
26  
27  
28  
29  
30  
31  
32  
33  
34  
35  
36  
37  
38  
39  
40  
41  
42  
43  
44  
45  
46  
47  
48  
49  
50  
51  
52  
53  
54  
55  
56  
57  
58  
59  
60

For peer review only
